# Supplementary material for: The Roles of Net Photosynthetic Rate and Transpiration Efficiency on Economic Yield of Jerusalem artichoke (Helianthus tuberosus L.) Genotypes under Different Drought Durations during the Terminal Growth Stages
Source: MDPI journal article supplement (doi:10.3390/agronomy13071882), 2023-07-17
Supplement: s1 [file s1]

Archive with 1 entries (1 files):
- agronomy-2499330-supplementary.pdf
